# Supplementary material
Source: Springer Nature journal article supplement (https://www.springermedizin.de/resource/supplementary/12957_2013_1408_MOESM17_ESM.pdf/9562532)
Supplement: MOESM17 [file 9562532]

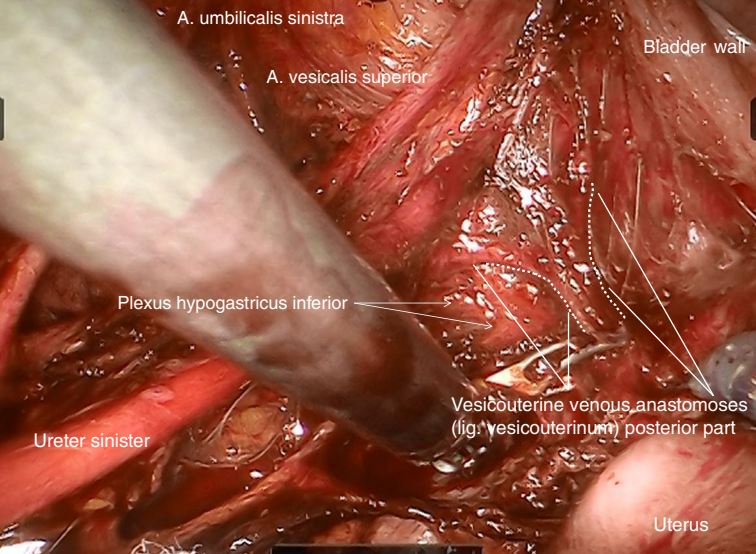

A. umbilicalis sinistra

Bladder wall

A. vesicalis superior

Plexus hypogastricus inferior

Ureter sinister

Vesicouterine venous anastomoses  
(lig. vesicouterinum) posterior part

Uterus
